# Supplementary material
Source: PubMed Central journal article supplement (PMC7322811)
Supplement: L20-0887_Supplement.pdf [file L20-0887_Supplement.pdf]

## Supplementary Material\*

Kansagara D, Mackey K, Vela K. Update Alert: Risks and Impact of Angiotensin-Converting Enzyme Inhibitors or Angiotensin-Receptor Blockers on SARS-CoV-2 Infection in Adults. *Ann Intern Med*. 25 June 2020. [Epub ahead of print]. doi:10.7326/L20-0887

### *Supplement.* **Supplementary Materials**

\* This supplementary material was provided by the authors to give readers further details on their article. The material was reviewed but not copyedited.

**Supplement Table 1. Use of ACEIs or ARBs and Odds of Receiving a Positive COVID-19 Test Result, update June 8, 2020**

| Study (Reference)* | Period; Population; Setting                                                                    | Patient Characteristics                                                                                                                                                                                         | Patients with Positive COVID-19 Test Result/ Patients Tested, <i>n/N</i> (%) | Patients with Positive COVID-19 Test Result Receiving ACEI or ARB, <i>n/N</i> (%); Not Receiving ACEI or ARB, <i>n/N</i> (%) | aOR for Positive COVID-19 Test Result with ACEI or ARB Use (95% CI)               |
|--------------------|------------------------------------------------------------------------------------------------|-----------------------------------------------------------------------------------------------------------------------------------------------------------------------------------------------------------------|------------------------------------------------------------------------------|------------------------------------------------------------------------------------------------------------------------------|-----------------------------------------------------------------------------------|
| Mehta(2)           | 3/8/20-4/12/20; all patients with SARS-CoV2 test in 1 health system in 2 states; United States | N = 18,472<br>(Demographics reported below are for those taking v not taking ACEI)<br>Mean age: 62 v 48<br>Male: 53 v 39%<br>Black: 22 v 20%<br>HTN: 94 v 36%<br>DM: 48 v 17%<br>CAD: 29 v 11 %<br>CHF: 25 v 9% | 1735/18,472 (9.4)                                                            | Case patients receiving ACEI: 116/1735<br>Case patients receiving ARB: 98/1735                                               | 0.97 (0.81-1.15)<br>(propensity score adjusted for age, sex, comorbid conditions) |

ACEI = angiotensin-converting enzyme inhibitor; aOR = adjusted odds ratio; ARB = angiotensin-receptor blocker; CAD = coronary artery disease; CHF = congestive heart failure; DM = diabetes mellitus; HTN = hypertension; SARS-CoV-2 = severe acute respiratory syndrome coronavirus 2.

\* All studies from 2020.

**Supplement Table 2. Use of ACEIs or ARBs and Odds of Severe COVID-19 Illness, Update June 8, 2020**

| Study (Reference)* | Period; Population; Setting                                                                    | Patient Characteristics                                                                                                                                                                                      | Disease Severity Definition                            | Patients Receiving ACEI or ARB with Severe Illness, <i>n/n</i> (%); With Nonsevere Illness, <i>n/n</i> (%) | Unadjusted OR for Severe Illness with ACEI or ARB (95% CI) | aOR for Severe Illness with ACEI or ARB (95% CI)                                                                                                                                  | Other Outcomes |
|--------------------|------------------------------------------------------------------------------------------------|--------------------------------------------------------------------------------------------------------------------------------------------------------------------------------------------------------------|--------------------------------------------------------|------------------------------------------------------------------------------------------------------------|------------------------------------------------------------|-----------------------------------------------------------------------------------------------------------------------------------------------------------------------------------|----------------|
| Mehta(2)           | 3/8/20-4/12/20; all patients with SARS-CoV2 test in 1 health system in 2 states; United States | N = 18,472 (Demographics reported below are for those taking v not taking ACEI)<br>Mean age: 62 v 48<br>Male: 53 v 39%<br>Black: 22 v 20%<br>HTN: 94 v 36%<br>DM: 48 v 17%<br>CAD: 29 v 11 %<br>CHF: 25 v 9% | Hospitalization; ICU admission; mechanical ventilation |                                                                                                            |                                                            | Hospitalization: 1.93 (1.38-2.71)<br>ICU admission: 1.64 (1.07-2.51)<br>Mechanical ventilation: 1.32 (0.80-2.18)<br>(propensity score adjusted for age, sex, comorbid conditions) |                |
| Chen(3)            | 1/1/20-3/17/20; Adults with COVID-19, HTN, and DM admitted to 1 hospital; China                | N = 71<br>Mean age: 67 y<br>HTN: 100%<br>DM: 100%                                                                                                                                                            | In-hospital death                                      | 4/14 (28.6); 28/57 (49.1)                                                                                  | 0.41 (0.12-1.48)                                           |                                                                                                                                                                                   |                |
| Huang(4)           | 2/7/20-3/3/20; Adults with COVID-19 and HTN admitted to 1 hospital; China                      | N = 50<br>ACEI/ARB group v non-ACEI/ARB group:<br>Mean age: 53 v 68 y<br>Male: 50 v 57%<br>DM: 0 v 13%<br>HTN: 100%                                                                                          | Per National Health Commission of China†               | 13/37 (35.1); 7/13 (53.9)                                                                                  | 0.46 (0.13-1.67)                                           |                                                                                                                                                                                   |                |
| Jung(5)            | Through 4/8/20; Adults with COVID-19; Korea (nationwide study)                                 | N = 5179<br>Mean age: 45<br>Male: 44%<br>DM: 17%                                                                                                                                                             | Death                                                  | 33/84 (39.3); 762/5095 (15.0)                                                                              | 3.88 (2.48-6.05)                                           | 0.88 (0.53-1.44)<br>(adjusted for age, sex, comorbidities,                                                                                                                        |                |

HTN: 22%  
CVD: 6%

immunosuppression,  
hospital type)

ACEI = angiotensin-converting enzyme inhibitor; aOR = adjusted odds ratio; ARB = angiotensin-receptor blocker; CAD = coronary artery disease; CHF = congestive heart failure; HTN = hypertension; ICU = intensive care unit; OR = odds ratio.

\* All studies from 2020.

† National Health Commission of China severity definition: mild—mild symptoms but no imaging evidence of pneumonia; moderate—fever and other respiratory tract symptoms with imaging findings of pneumonia; severe—respiratory distress, tachypnea ( $\geq 30$  breaths per minute),  $O_2$  saturation  $\leq 93\%$ ,  $PaO_2/FiO_2 \leq 300$  mm Hg; critical—need for mechanical ventilation, shock, organ failure requiring intensive care.

**Supplement Table 3. Quality Assessment of Cohort Studies using the Newcastle-Ottawa Quality Assessment Scale, June 8, 2020 update**

| Author (all year 2020) | Selection                                 |                                      |                            |                                                                                                   | Comparability                                                    | Outcome                |                                                   |                                   |
|------------------------|-------------------------------------------|--------------------------------------|----------------------------|---------------------------------------------------------------------------------------------------|------------------------------------------------------------------|------------------------|---------------------------------------------------|-----------------------------------|
|                        | Representativeness of the exposed cohort* | Selection of the non-exposed cohort* | Ascertainment of exposure* | Demonstration that outcome of interest was not present at start of study, OR baseline assessment* | Comparability of cohorts on the basis of the design or analysis* | Assessment of outcome* | Was follow-up long enough for outcomes to occur?* | Adequacy of follow up of cohorts* |
| Mehta (2)              | 1                                         | 1                                    | 1                          | 1                                                                                                 | 1                                                                | 0                      | 0                                                 | 1                                 |
| Chen (3)               | 0                                         | 1                                    | 0                          | 1                                                                                                 | 0                                                                | 1                      | 1                                                 | 1                                 |
| Huang (4)              | 0                                         | 1                                    | 0                          | 1                                                                                                 | 0                                                                | 1                      | 0                                                 | 1                                 |
| Jung (5)               | 1                                         | 1                                    | 1                          | 1                                                                                                 | 1                                                                | 1                      | 0                                                 | 1                                 |
|                        |                                           |                                      |                            |                                                                                                   |                                                                  |                        |                                                   |                                   |

\*Key: Newcastle-Ottawa QA scale for Cohort studies

Representativeness of the exposed cohort

Enter 0 or 1:

1 = truly representative of the average \_\_ in the community

1 = somewhat representative of the average \_\_ in the community

0 = selected group of users, e.g., nurses, volunteers

0 = no description of the derivation of the cohort

Selection of the non-exposed cohort

Enter 0 or 1:

1 = drawn from the same community as the exposed cohort

0 = drawn from a different source

0 = no description of the derivation of the non-exposed cohort

Ascertainment of exposure

Enter 0 or 1:

1 = secure record  
1 = structured interview  
0 = written self-report  
0 = no description

Demonstration that outcome of interest was not present at start of study, OR baseline assessment

*Enter 0 or 1:*

1 = yes  
0 = no

Comparability of cohorts on the basis of the design or analysis

*Enter 0 or 1:*

1 = study accounts/controls for most important factors(s), e.g., age  
0 = no adjustment for potential confounders

Assessment of outcome

*Enter 0 or 1:*

1 = independent blind assessment  
1 = record linkage  
0 = self-report  
0 = no description

Was follow-up long enough for outcomes to occur?

*Enter 0 or 1:*

1 = yes  
0 = no or unclear

Adequacy of follow up of cohorts

*Enter 0 or 1:*

1 = complete follow up; all subjects accounted for.  
1 = subjects lost to follow up unlikely to introduce bias; small number (less than 20%) lost, or description was provided of those lost  
0 = follow up rate < 80% and no description of those lost  
0 = no description
